# Supplementary material for: Chaperone-Mediated Sec61 Channel Gating during ER Import of Small Precursor Proteins Overcomes Sec61 Inhibitor-Reinforced Energy Barrier
Source: PubMed Central journal article supplement — Cell Rep. 2018 May 2;23(5):1373–86. doi: 10.1016/j.celrep.2018.03.122 (PMC5946456; doi:10.1016/j.celrep.2018.03.122), 2018-05-02
Supplement: mmc1.pdf [file mmc1.pdf]

**Cell Reports, Volume 23**

**Supplemental Information**

**Chaperone-Mediated Sec61 Channel Gating during ER**

**Import of Small Precursor Proteins Overcomes**

**Sec61 Inhibitor-Reinforced Energy Barrier**

**Sarah Haßdenteufel, Nicholas Johnson, Adrienne W. Paton, James C. Paton, Stephen High, and Richard Zimmermann**

**A** Preproapelin - co

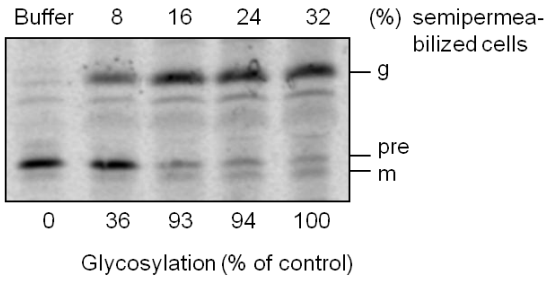

**B** Preproapelin - post

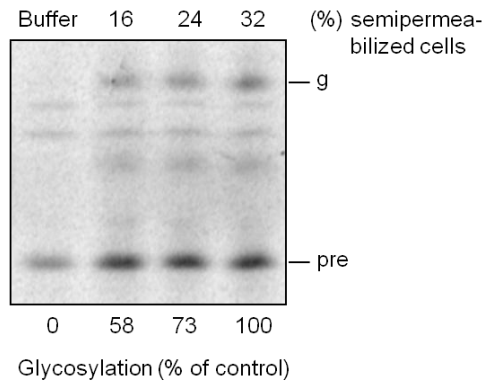

**C** Preproapelin - co

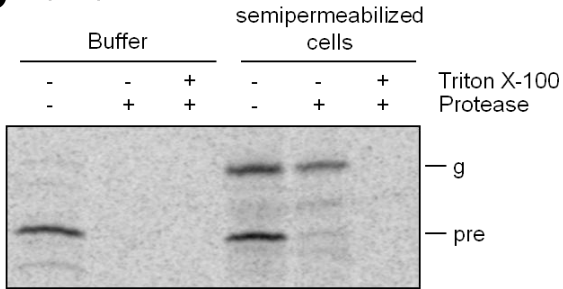

**D** Prestatherin - co

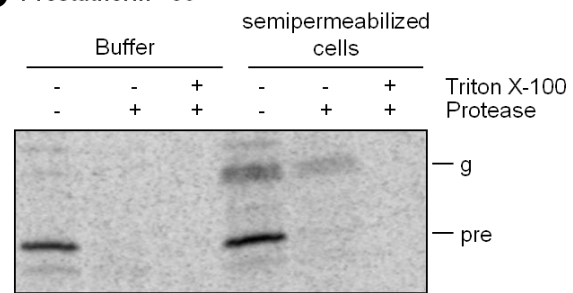

**E** Preproapelin - co

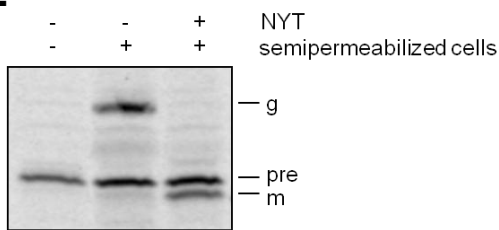

**F** Prestatherin - co

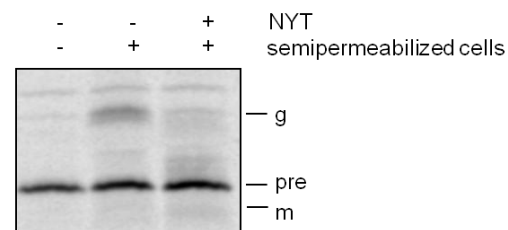

**G** Mr

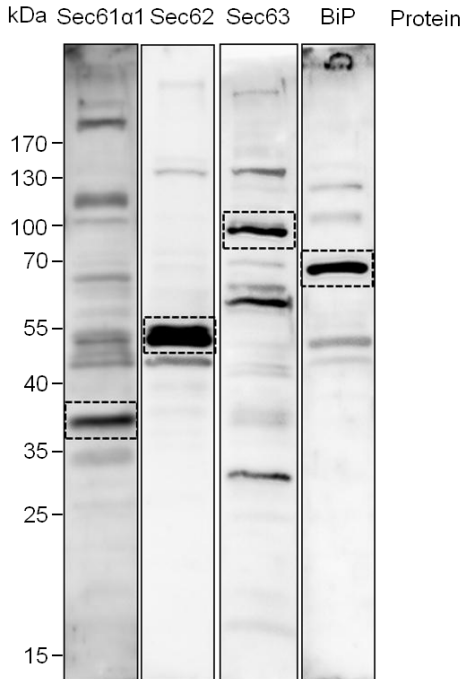

**H** Mr

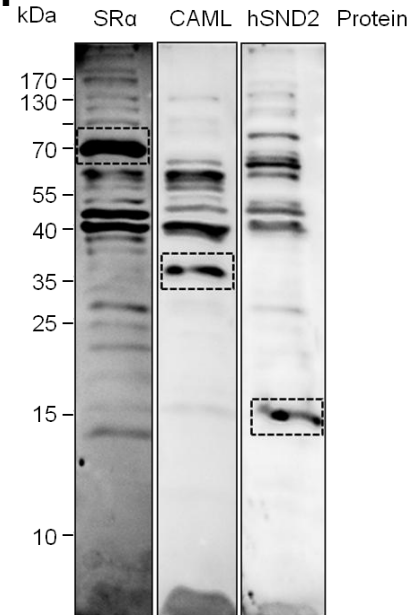

**I** semipermeabilized cells

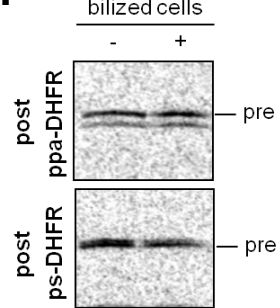

**Figure S1. Transport of preproapelin and prestatherin into the human ER, Related to Figure 1.**

Note that under co-translational conditions, precursor polypeptide chains and fully-synthesized precursors were targeted and inserted into Sec61 complexes. Under post-translational conditions, only the targeting and membrane insertion of completed precursor polypeptides occurred. **A-B**) Titration of HeLa cell-derived ER membranes in ppa translocation defined the linear range of the assay. Following semipermeabilization of untreated HeLa cells, ppa was co- (co, **A**) or post-translationally (post, **B**) incubated with the indicated concentrations of ER membranes (8% to 32% v/v of the total translation mix, equivalent to 3,200 to 12,800 cell equivalents/ $\mu$ l). **C-D**) Sequestration assay for demonstration of complete ppa and ps translocation. Following co-translational incubation of ppa (**C**) or ps (**D**) with untreated semipermeabilized HeLa cells (3,200 cell equivalents/ $\mu$ l), membranes were re-isolated in sucrose supplemented with combinations of proteinase K and Triton X-100 as indicated. **E-F**) Transport in the presence of the tripeptide NYT for demonstration of N-glycosylation. Following semipermeabilization of untreated HeLa cells, ppa (**E**) or ps (**F**) were co-translationally incubated with ER membranes (3,200 cell equivalents/ $\mu$ l) in the presence of NYT (0.5 mM). Radioactive samples were subjected to SDS-PAGE and phosphorimaging. Transport efficiencies were calculated as the proportion of N-glycosylation on the total amount of synthesized precursor with the control sample set to 100%. Shown are the relevant parts of representative phosphorimages. Pre: precursor polypeptide; m: mature protein; g: singly or doubly glycosylated protein. **G, H**) HeLa cells were characterized with validated antibodies by Western blot (Lang et al., 2012; Johnson et al., 2013; Haßdenteufel et al., 2017). Shown are representative blot images. The respective protein of interest was identified by its absence in siRNA treated cells (see Figures S2-5) and is boxed with broken lines. **I**) In contrast to Figure 1C, the indicated precursors were post-translationally incubated with the

ER membranes. Notably, there was no signal peptide cleavage in the presence of semi-permeabilized cells under these conditions.

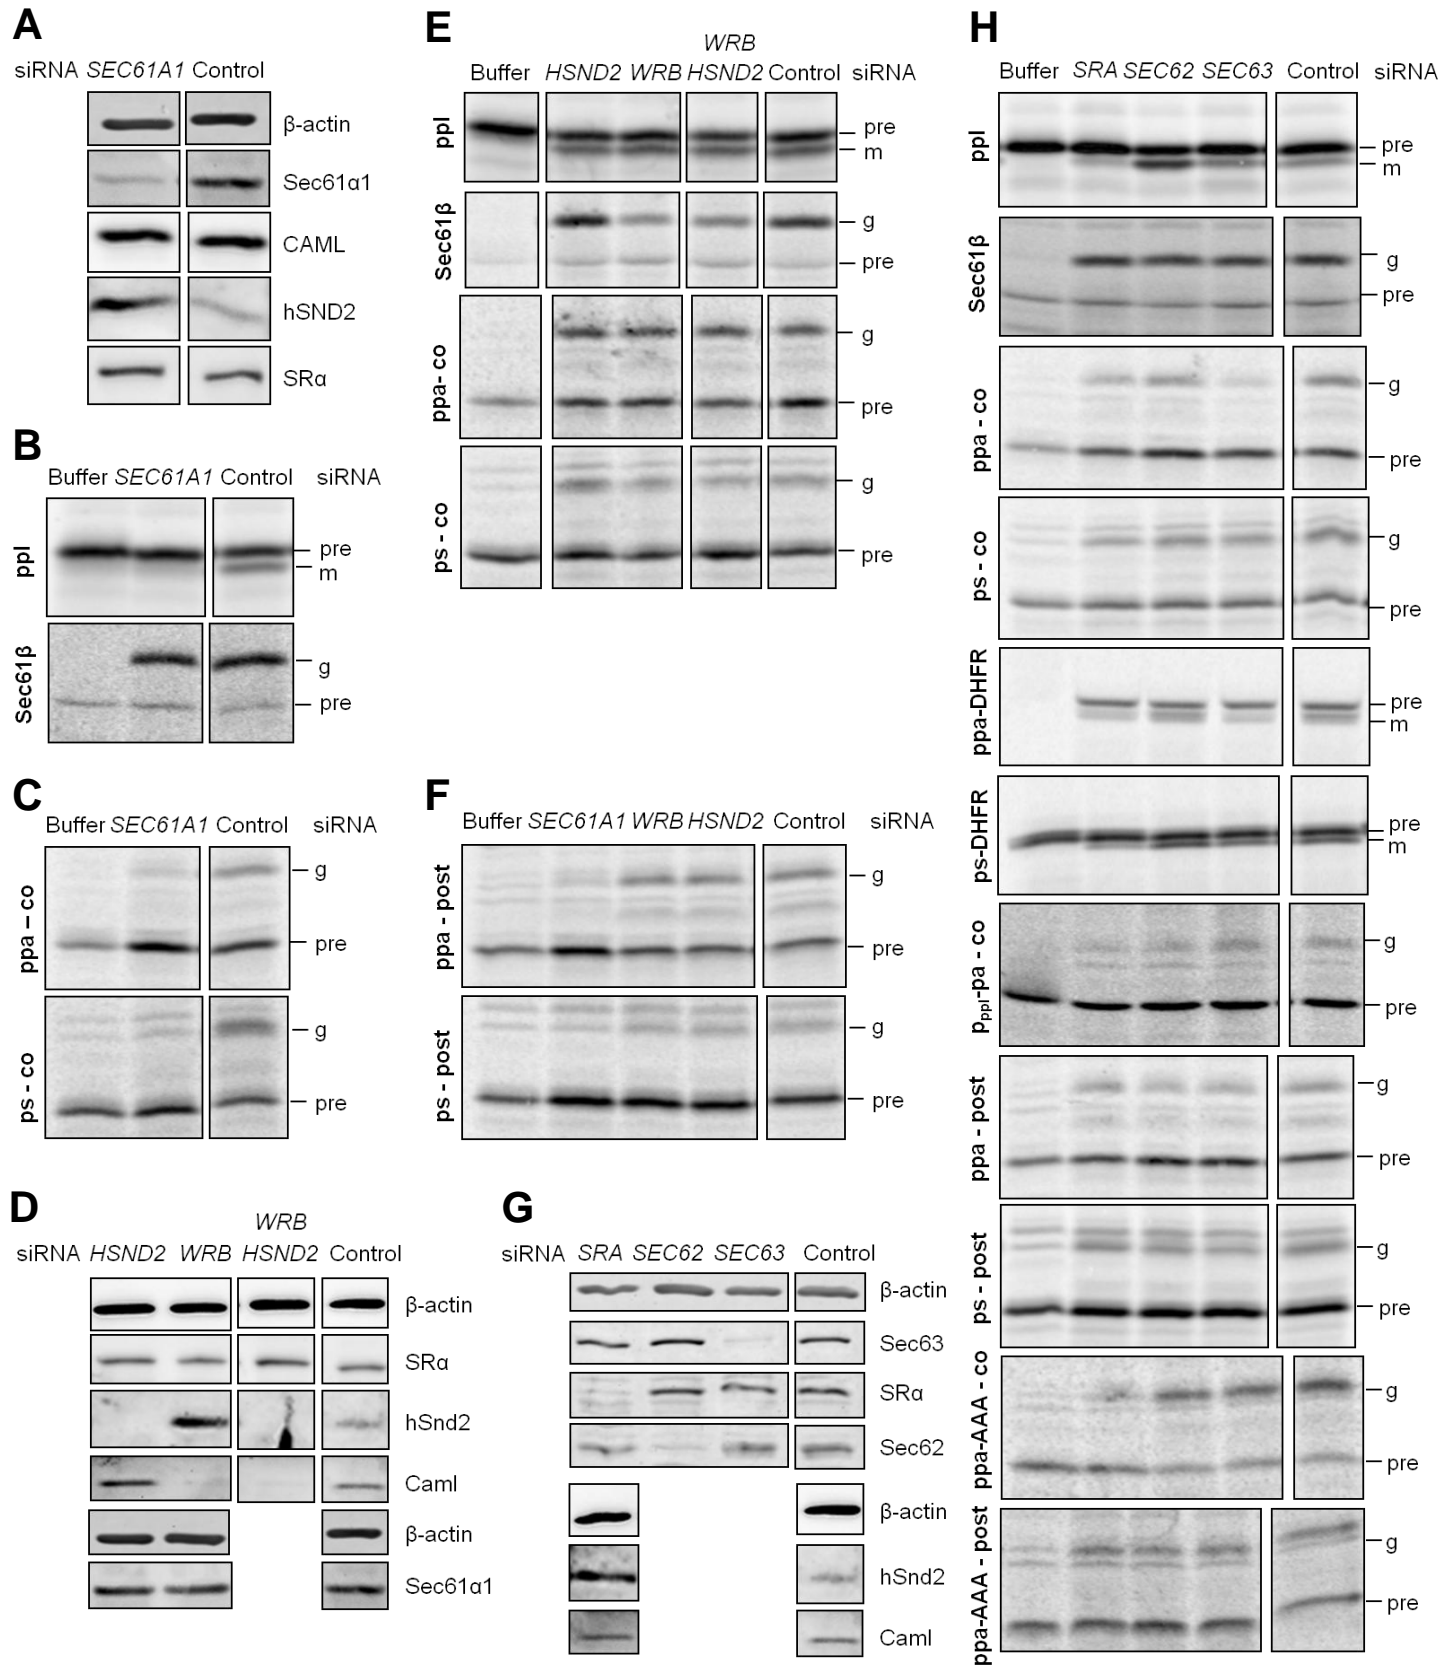

**Figure S2. Effects of Sec61 $\alpha$ 1, Sec62, Sec63, SR $\alpha$ , hSnd2 and Wrb depletion on transport of short presecretory proteins, Related to Figures 2 and 3.**

**A, D, G)** Representative Western blots validating protein content. **B-C, E, F, H)** Phosphorimages of representative SDS-PAGE gels. Prior to preparation of semipermeabilized cells, HeLa cells were treated with the indicated siRNA(s). Precursors were co- (co) or post-translationally (post) incubated with the indicated ER membranes. Pre: precursor polypeptide; m: mature protein; g: glycosylated protein.

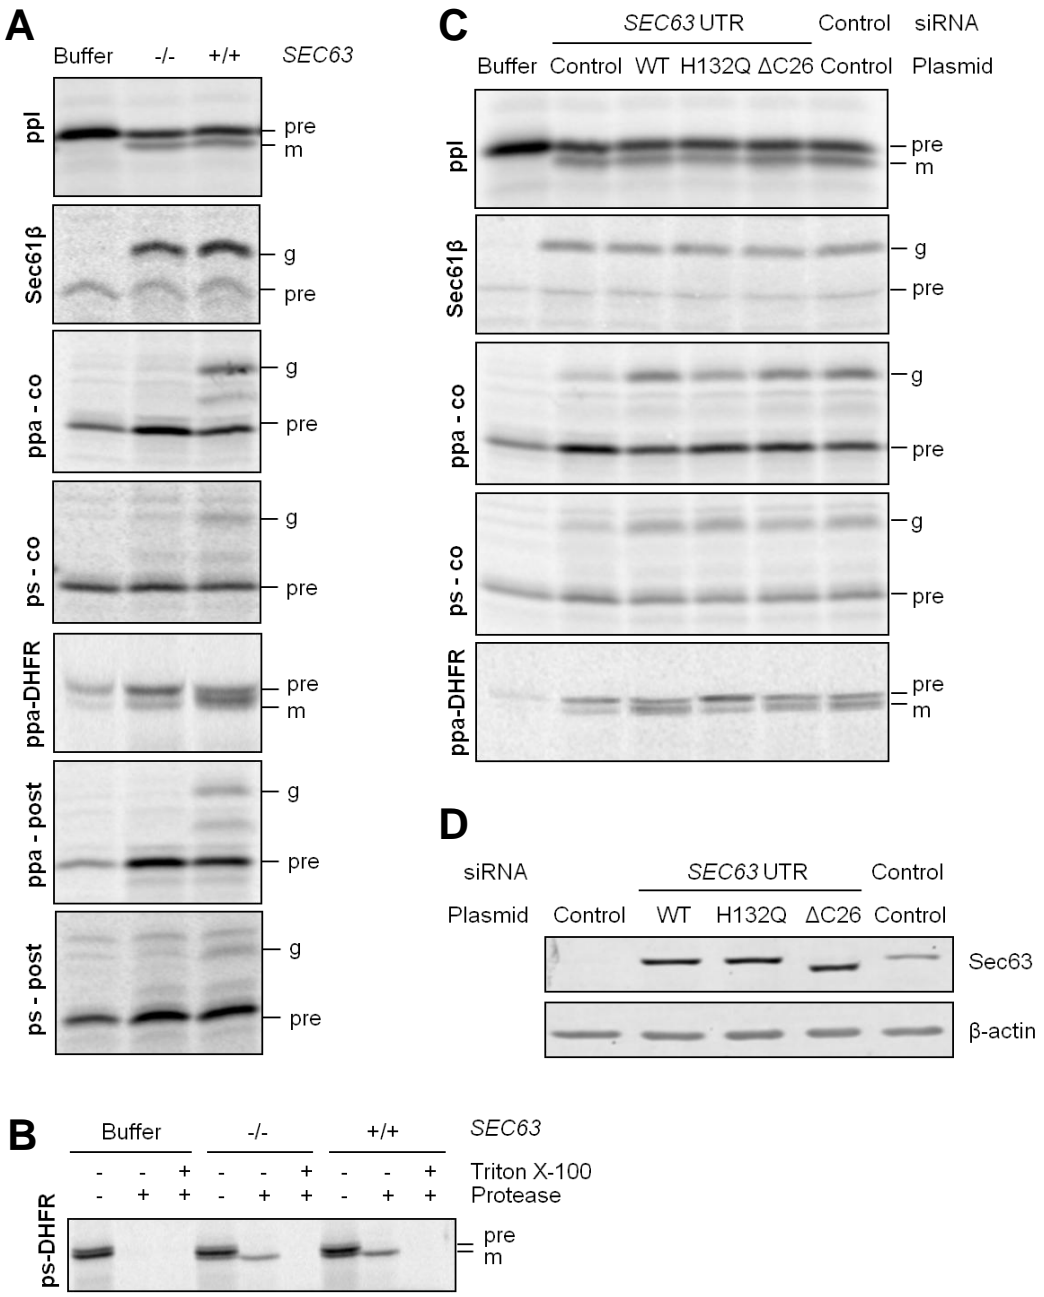

**Figure S3. Effects of murine *SEC63* knock-out on transport of short presecretory proteins and complementation of *SEC63* siRNA effects, Related to Figure 3.**

**A-C)** Phosphorimages of representative SDS-PAGE gels. **D)** Representative Western blot validating protein content. Semipermeabilized cells were prepared from murine *SEC63*-null cells (**A, B**) or HeLa cells (**C, D**). Prior to preparation, HeLa cells were treated with *SEC63*-UTR siRNA and transfected with the indicated plasmids. Precursors were co- (co) or post-translationally (post) incubated with the indicated ER membranes. Pre: precursor polypeptide; m: mature protein; g: glycosylated protein.



**A**

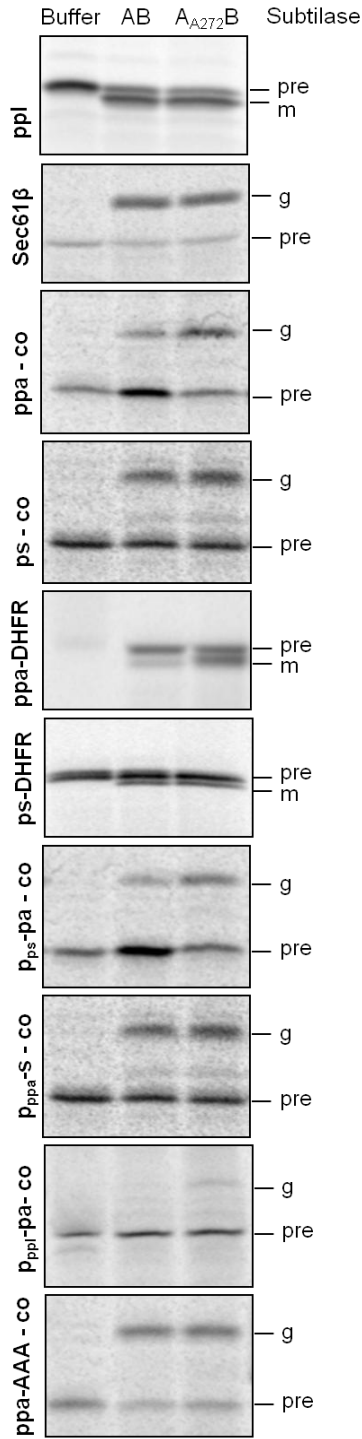

**B**

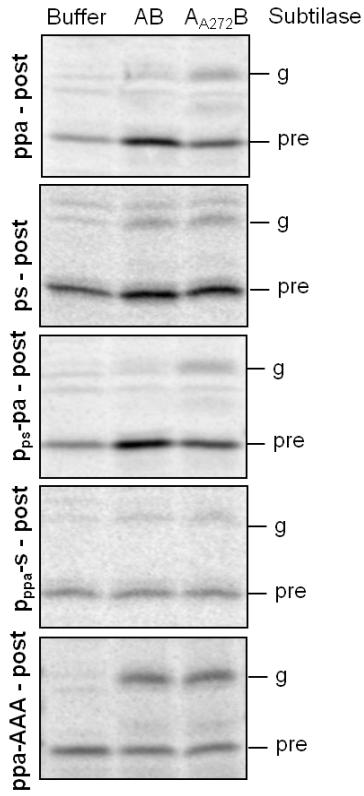

**C**

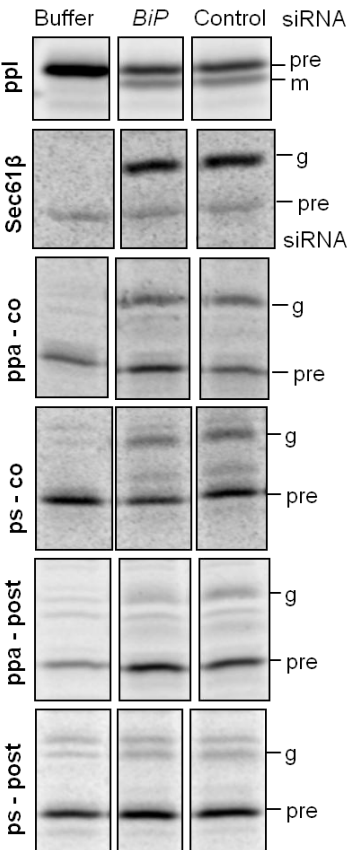

**D**

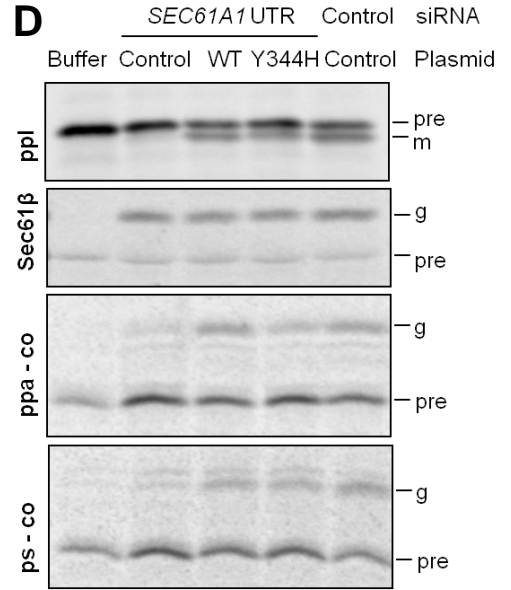

**E**

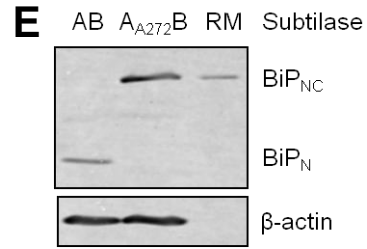

**F**

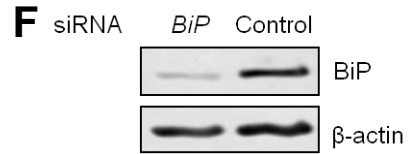

**G**

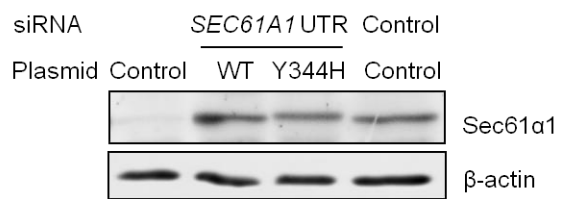

**Figure S4. Effects of of subtilase toxin and *BIP* siRNA on transport of short presecretory proteins and complementation of *SEC61A1* siRNA effects, Related to Figure 4.**

**A-D)** Phosphorimages of representative SDS-PAGE gels. **E-G)** Representative Western blots validating protein content. Prior to preparation of semipermeabilized cells, HeLa cells were treated with active or inactive subtilase toxin (**A, B, E**), with *BIP* (**C, F**) or *SEC61A1*-UTR siRNA and transfected with the indicated plasmids (**D, G**). Precursors were co- (co) or post-translationally (post) incubated with the indicated ER membranes. Pre: precursor polypeptide; m: mature protein; g: glycosylated protein.

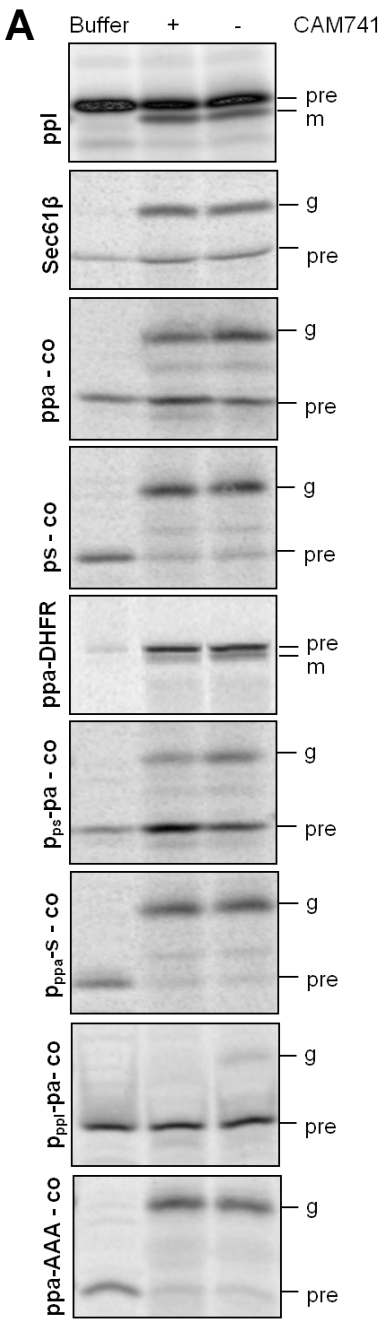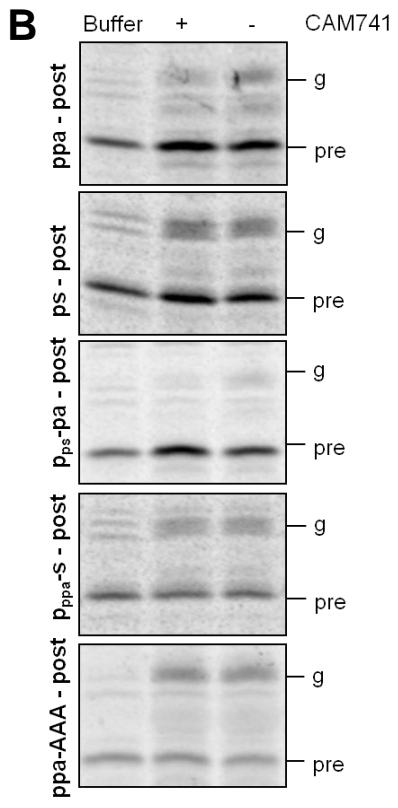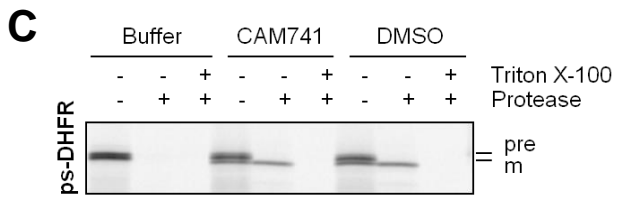

**Figure S5. Effects of CAM741 on transport of short presecretory proteins, Related to Figure 5.**

**A-C)** Phosphorimages of representative SDS-PAGE gels. Precursors were co- (co) or post-translationally (post) incubated with canine pancreatic rough microsomes in the presence of solvent or CAM741. Pre: precursor polypeptide; m: mature protein; g: glycosylated protein.

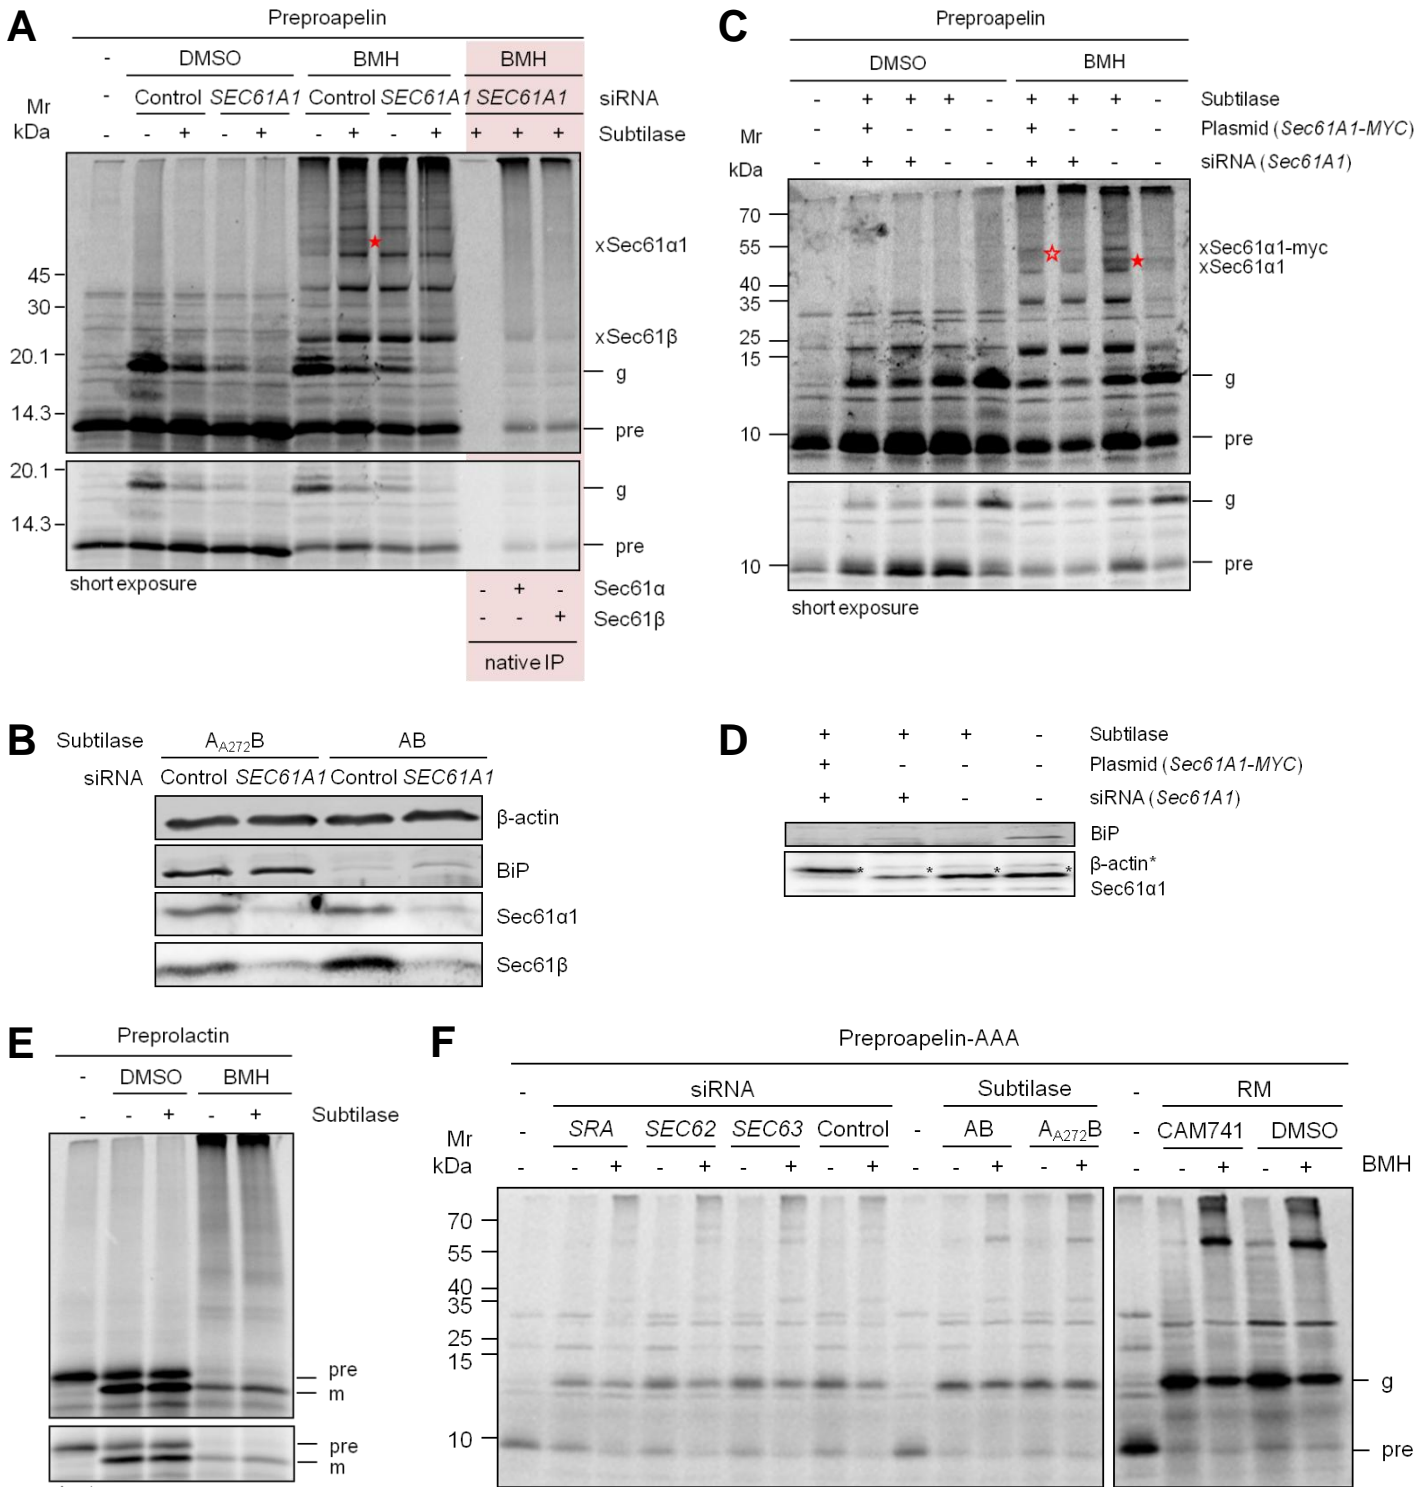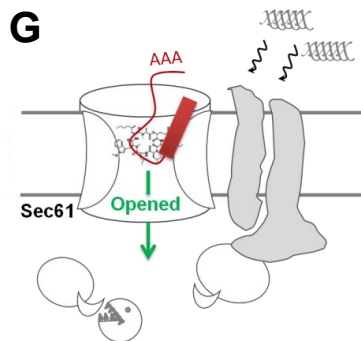

**Figure S6. Identification of Sec61 $\alpha$ 1 and Sec61 $\beta$  as crosslinking partners of preproapelin upon co-translational translocation in the absence of BiP or Sec61 complex and crosslinking of ppl and preproapelin-AAA, Related to Figure 6.**

**A-D)** Identification of crosslinking partners of ppa in the absence of Sec61 complex (**A, B**) or BiP (**A-D**) and in the presence of tagged Sec61 $\alpha$ , respectively (**C, D**). HeLa cells were treated with *SEC61A1*-UTR siRNA or control siRNA and transfected with *SEC61A1*-Myc/6His or control plasmid, and then treated with subtilase AB or inactive subtilase variant  $A_{A272}B$ . Following the preparation of semipermeabilized cells used for co-translational translocation of ppa, membranes were obtained by sedimentation, re-suspended in XL-buffer, and supplemented with BMH or DMSO for crosslinking. Radioactive samples were subjected to SDS-PAGE and phosphorimaging. Where indicated, immunoprecipitation with validated antibodies was carried out after crosslinking and membrane solubilisation under non-denaturing conditions (0.65% CHAPS and 0.4 M KCl; Tyedmers et al., 2000; **A**). Relevant crosslinking products of ppa to Sec61 $\alpha$ 1 (filled red asterisk), Sec61 $\alpha$ 1-Myc/6His (open red asterisk) or Sec61 $\beta$  (blue asterisk) are indicated. Pre: precursor polypeptide; g, glycosylated protein. **B, D)** Protein content was validated by Western blot. We note that the tagged Sec61 $\alpha$  comigrated with  $\beta$ -actin (**D**). **E, F)** Crosslinking of fully-synthesized ppl (**E**) and ppa-AAA (**F**). Prior to preparation of semipermeabilized cells, HeLa cells were treated with the indicated siRNA (Table 1) or subtilase toxin. Alternatively, canine pancreatic rough microsomes were treated with solvent or CAM741. The presecretory proteins ppl and ppa-AAA were co-translationally incubated with the indicated ER membranes, which were sedimented and re-suspended in XL-buffer before crosslinking with BMH. Radioactively labelled samples were subjected to SDS-PAGE and phosphorimaging. pre: precursor polypeptide; g: glycosylated protein; m, mature protein. **G)** Schematic representation of

ppa-AAA translocation upon depletion of Sec62, Sec63 or BiP by siRNA (waved arrows) or toxin (pacman) treatment, or in the presence of CAM741. Without the help by accessory translocon components, insertion into the Sec61-channel efficiently occurs without trapping of ppa-AAA precursor polypeptides.

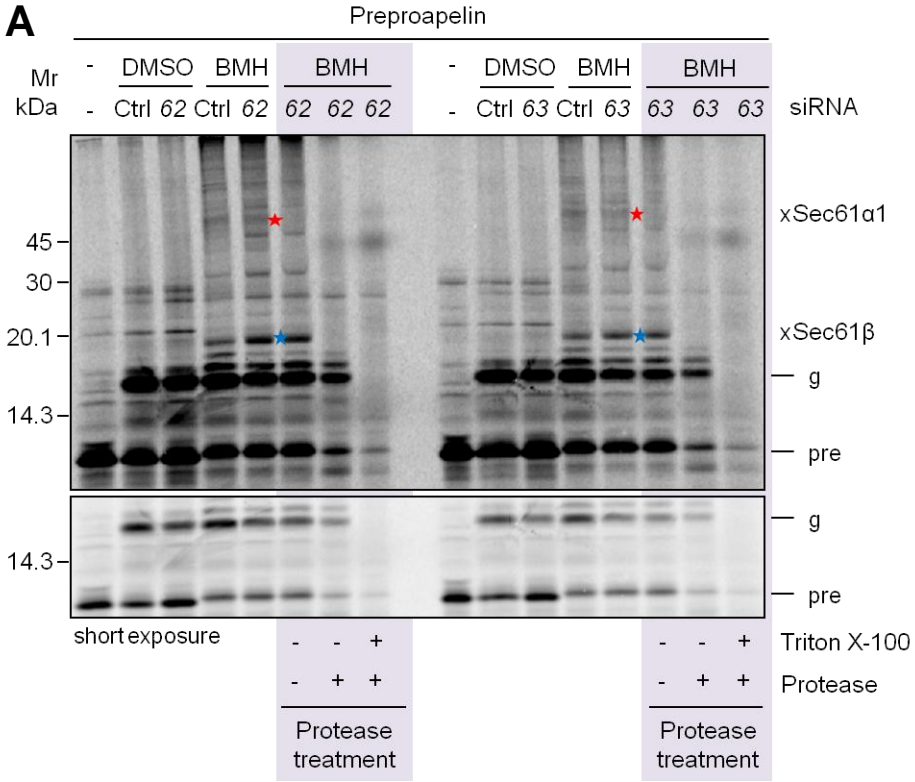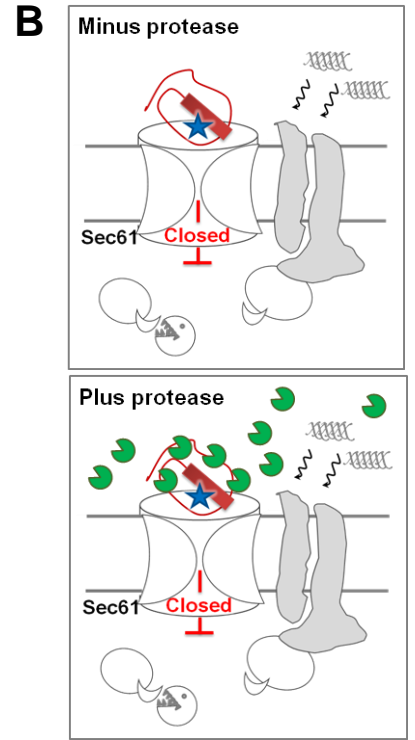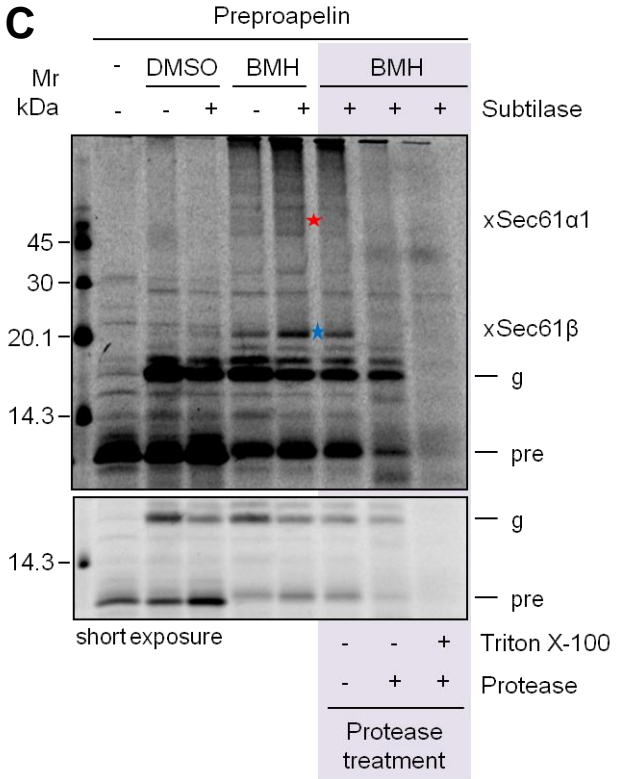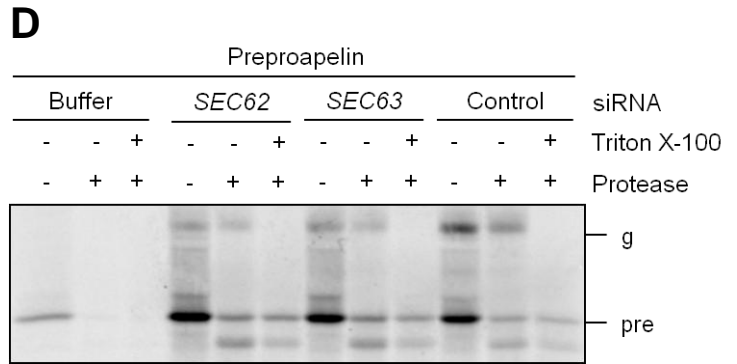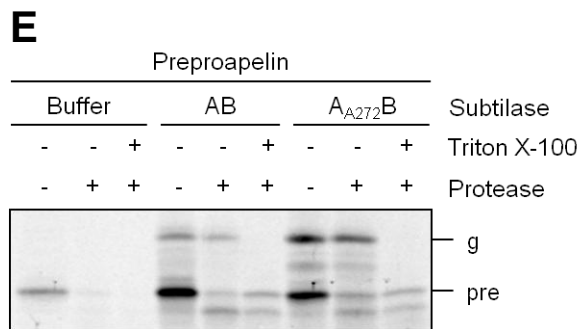



**Figure S7. Localisation of preproapelin and its crosslinking products after co-translational translocation in the absence of Sec62, Sec63, or BiP, Related to Figure 6.**

**A-E)** Prior to preparation of semipermeabilized cells, HeLa cells were treated with the indicated siRNA or subtilase cytotoxin. ppa was co-translationally incubated with the indicated ER membranes, which were sedimented and resuspended in XL-buffer before sequestration analysis (i.e., treatment with proteinase K (green pacman in **B**) in the absence or presence of Triton X-100) and/or crosslinking with BMH plus subsequent sequestration analysis. Samples were subjected to SDS-PAGE and phosphorimaging. Relevant crosslinking products of ppa to Sec61 $\alpha$ 1 or Sec61 $\beta$  are indicated by red and blue asterisks, respectively. Pre: ppa; g: glycosylated pa. **B)** Schematic representation of ppa translocation upon depletion of Sec62, Sec63 or BiP by siRNA (waved arrows) or toxin (pacman) treatment.

**Table S1. Amino acid sequences of the model proteins, Related to Figure 1.**

Underlined: SP or TMD; italics: linker dipeptide; red: mutagenized positively charged cluster; blue: putative translational pausing element.

| Name                         | Sequence                                                                                                                                                                                                                                                                                                                 |
|------------------------------|--------------------------------------------------------------------------------------------------------------------------------------------------------------------------------------------------------------------------------------------------------------------------------------------------------------------------|
| ppa<br>OPG2                  | <u>MNLRLCVQALLLWLSLTA</u> VCG<br>GSLMPLPDGNGLEDGNVRHLVQPRGSRNGPGPWQGGRRKFRRQRPRLSHKGMPMF<br>MNGTEGPNFYVPFSNKTG                                                                                                                                                                                                           |
| p <sub>ppl</sub> -pa<br>OPG2 | <u>MDSKGSSQKGSRLLLLLVVS</u> NLLCQGVVS<br>GSLMPLPDGNGLEDGNVRHLVQPRGSRNGPGPWQGGRRKFRRQRPRLSHKGMPMF<br>MNGTEGPNFYVPFSNKTG                                                                                                                                                                                                   |
| p <sub>ps</sub> -pa<br>OPG2  | <u>MKFLVF</u> FILALMVSMIGA<br>GSLMPLPDGNGLEDGNVRHLVQPRGSRNGPGPWQGGRRKFRRQRPRLSHKGMPMF<br>MNGTEGPNFYVPFSNKTG                                                                                                                                                                                                              |
| ppa-AAA<br>OPG2              | <u>MNLRLCVQALLLWLSLTA</u> VCG<br>GSLMPLPDGNGLEDGNVRHLVQPRGSRNGPGPWCGGAAAFRRQRPRLSHKGMPMF<br>MNGTEGPNFYVPFSNKTG                                                                                                                                                                                                           |
| ps<br>OPG2                   | <u>MKFLVF</u> FILALMVSMIGA<br>DSSEKFLRRIGRFGYGYGPYQPVPEQPLYPQPYQPQYQQYTFMM<br>MNGTEGPNFYVPFSNKTG                                                                                                                                                                                                                         |
| p <sub>ppa</sub> -S<br>OPG2  | <u>MNLRLCVQALLLWLSLTA</u><br>DSSEKFLRRIGRFGYGYGPYQPVPEQPLYPQPYQPQYQQYTFMM<br>MNGTEGPNFYVPFSNKTG                                                                                                                                                                                                                          |
| ppl                          | <u>MDSKGSSQKGSRLLLLLVVS</u> NLLCQGVVS<br>TPVCPNGPGNCQVSLRDLFDRAVMVSHYIHDLSSEMFNEFDKRYAQQKGFITMALN<br>SHTSSLPTPEDKEQAQQT <del>HE</del> VLM <del>SL</del> LGLLRSW <del>ND</del> PLYHLVTEVRGMKGAPDAIL<br>SRAIEIEEENKRLLEGMEMIFGQVIPGAKETEPYPVWSGLPSLQTKDEDARYSAFYNL<br>LHCLRRDSSKIDTYLKL <del>LN</del> CRIIYN <del>NC</del> |
| Sec61β<br>OPG1               | MPAPASSTSVGSGSRSPSKLSAPRSAGSGGGSTLKQRKTTTSTAARSRAPGGAGTGG<br>MW RFYTDDSPGIK <u>VGPVPVLVMSLLFIASVFMLHIWGKYNRS</u><br>GPNFYVPFSNKTG                                                                                                                                                                                        |
| DHFR                         | MVRPLNCIVAVSQNMGIGKNGDLPWPPLRNEFKYFQRM <del>TT</del> SSVEGKQNLVIMGRK<br>TWFSIPEKNRPLKDRINIVLSRELKEPPRG <del>AH</del> FLAKSLDDALRLIEQPELASKVDMVWI<br>VGGSSVYQEAMNQPGHLRLFVTRIMQEFESDTFFPEIDLGKYKLLPEYPGVLSEVQEE<br>KGIKYKFEVYEKKD                                                                                         |

**Table S2. Characteristics of the model precursor proteins, Related to Figure 1.**

SP: signal peptide; TMD: transmembrane domain; total: precursor excluding OPG1/2 tag;

tagged: precursor including OPG1/2 tag;  $\Delta G^{pred}$ :  $\Delta G$  prediction; N-in<sup>pred</sup>: N-in prediction.

| <b>Precursor variant</b> | <b>Length (amino acids)<br/>(SP/total/tagged)</b> | <b>Charges<br/>(SP)</b> | <b><math>\Delta G^{pred}</math><br/>(SP or TMD)</b> | <b>N-in<sup>pred</sup><br/>(total/tagged)</b> |
|--------------------------|---------------------------------------------------|-------------------------|-----------------------------------------------------|-----------------------------------------------|
| ppa                      | 22/77/95                                          | 1+                      | -0.19                                               | 0.94/0.88                                     |
| ppa-DHFR                 | 22/266/-                                          | 1+                      | -0.19                                               | 0.70/-                                        |
| p <sub>ps</sub> -pa      | 19/74/92                                          | 1+                      | -0.91                                               | 0.96/0.92                                     |
| p <sub>pp</sub> -pa      | 30/85/103                                         | 3+1-                    | 5.36                                                | 0.66/0.98                                     |
| ppa-AAA                  | 22/77/95                                          | 1+                      | -0.19                                               | 0.93/0.88                                     |
| ps                       | 19/62/82                                          | 1+                      | -0.91                                               | 0.36/0.33                                     |
| ps-DHFR                  | 19/251/-                                          | 1+                      | -0.91                                               | 0.31/-                                        |
| p <sub>ppa</sub> -S      | 22/65/85                                          | 1+                      | -0.19                                               | 0.32/0.26                                     |
| ppl                      | 30/229/-                                          | 3+1-                    | 5.36                                                | 0.66/-                                        |
| Sec61 $\beta$            | -/96/109                                          | -                       | 0.51                                                | 0.06/0.16                                     |

**Table S3. Sequences of siRNAs used in this study, Related to Experimental Procedures.**

| <b>Name</b>               | <b>Target sequence</b> | <b>Source</b> | <b>Concentration (nM)</b> | <b>Time (h)</b> |
|---------------------------|------------------------|---------------|---------------------------|-----------------|
| <i>BIP</i> siRNA          | AAGCGGCTGTTTACTGCTTTT  | Qiagen        | 30                        | 48              |
| <i>SEC61A1</i> -UTR siRNA | AACACTGAAATGTCTACGTTT  | Applied       | 20                        | 96              |
| <i>SEC61B</i> -UTR siRNA  | ACCCAACATTTCTTGGACCAA  | Qiagen        | 20                        | 96              |
| <i>SEC62</i> siRNA        | AAGGCTGTGGCCAAGTATCTT  | Applied       | 20                        | 96              |
| <i>SEC63</i> -UTR siRNA   | AAGGGAGGTGTAGTTTTTTTA  | Applied       | 20                        | 96              |
| <i>HSND2</i> siRNA #2     | CACCTTAAGGATGTGATCCTA  | Qiagen        | 20                        | 96              |
| <i>SRA</i> -UTR siRNA     | CACCAGAGCTTTGCTAATAAT  | Qiagen        | 15                        | 96              |
| WRB siRNA                 | TGACACGTATGTACTAGTGAA  | Qiagen        | 20                        | 96              |
